# Supplementary material for: Linkage Disequilibrium Estimation of Effective Population Size with Immigrants from Divergent Populations: A Case Study on Spanish Mackerel (Scomberomorus commerson)
Source: Oxford University Press journal article supplement (doi:10.1534/g3.112.005124), 2013-03-28
Supplement: 005124_figures3.pdf [file 005124_figures3.pdf]

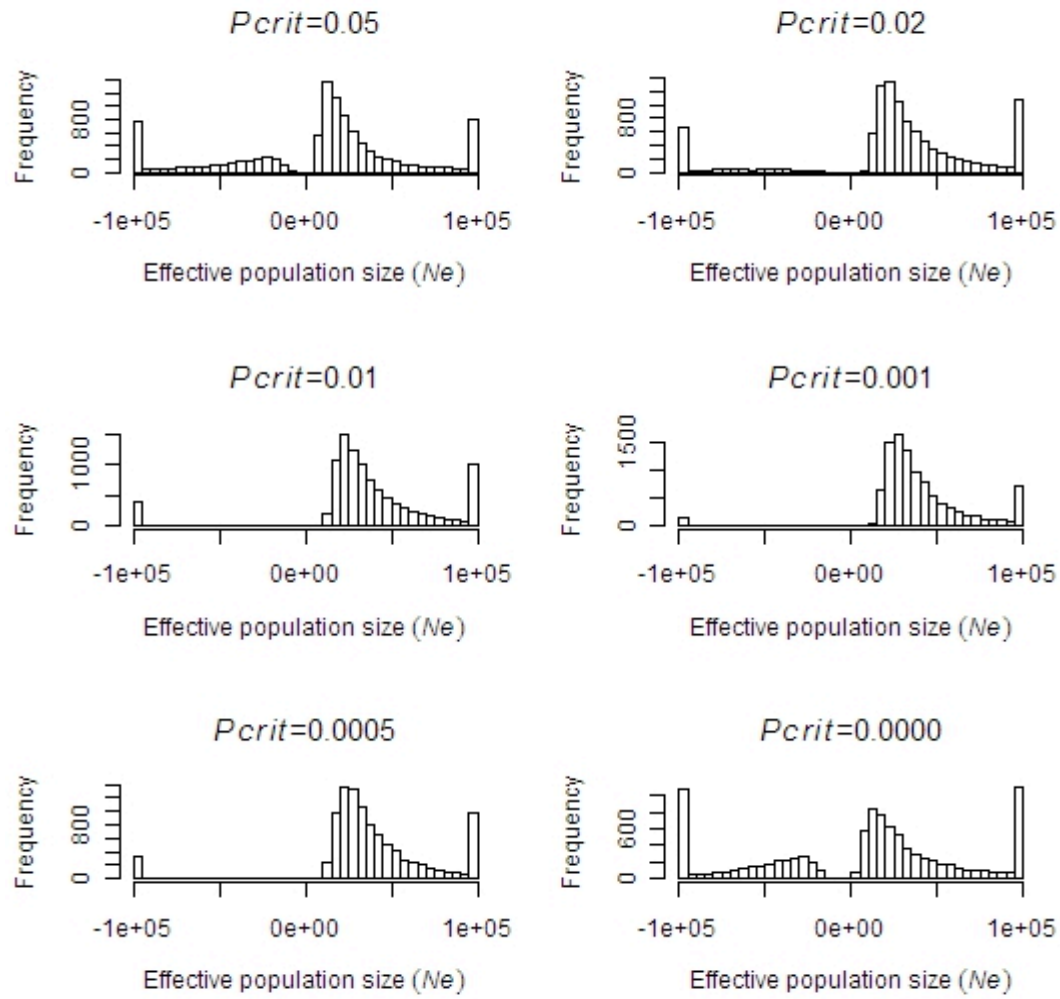

**Figure S3** Frequency of 10000  $N_e$  estimates when simulating a population size of  $N=30000$  at different  $P_{crit}$  values. The frequency of all  $N_e$  estimates less than 100000 and greater than 100000 were pooled and are indicated on the x-axis limits of each graph.
