# Supplementary material for: Linkage Disequilibrium Estimation of Effective Population Size with Immigrants from Divergent Populations: A Case Study on Spanish Mackerel (Scomberomorus commerson)
Source: Oxford University Press journal article supplement (doi:10.1534/g3.112.005124), 2013-03-28
Supplement: 005124_figures6.pdf [file 005124_figures6.pdf]

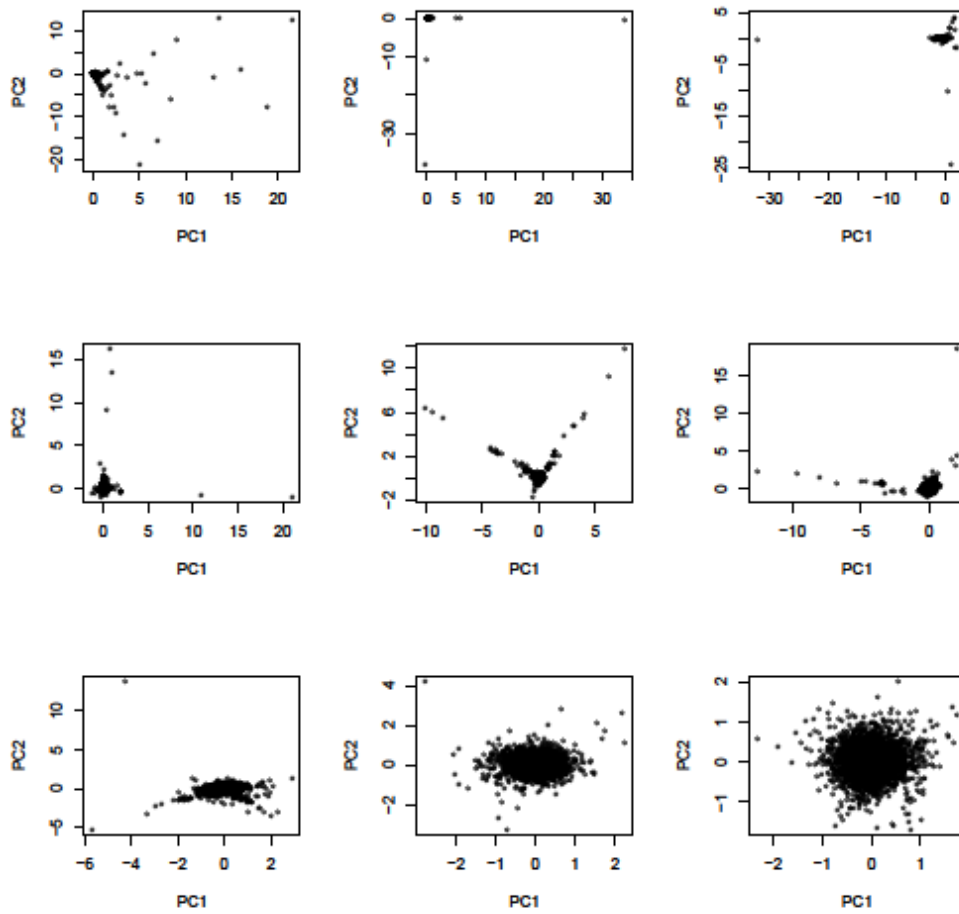

**Figure S6** Correspondence analysis plots after nine iterations of removing outliers in the empirical mackerel data that satisfied the threshold  $\sqrt{(PC1 + PC2)} > 2$  where  $PC1$  and  $PC2$  are the first and second principal components. Iterative steps are from top left to right moving down rows. The last plot 8 shows a cluster ball of genotypes after removing 116 genotypes from 5413 genotypes. One more iteration (not shown) removed 4 additional points.
